# Supplementary material for: Biochemical and Biophysical Characterization of Recombinant Yeast Proteasome Maturation Factor Ump1
Source: PubMed Central journal article supplement (PMC3962104; doi:10.5936/csbj.201304006), 2013-09-10
Supplement: CSBJ-7-e201304006_SM0001.pdf [file CSBJ-7-e201304006_SM0001.pdf]

Supplementary Figures and Tables

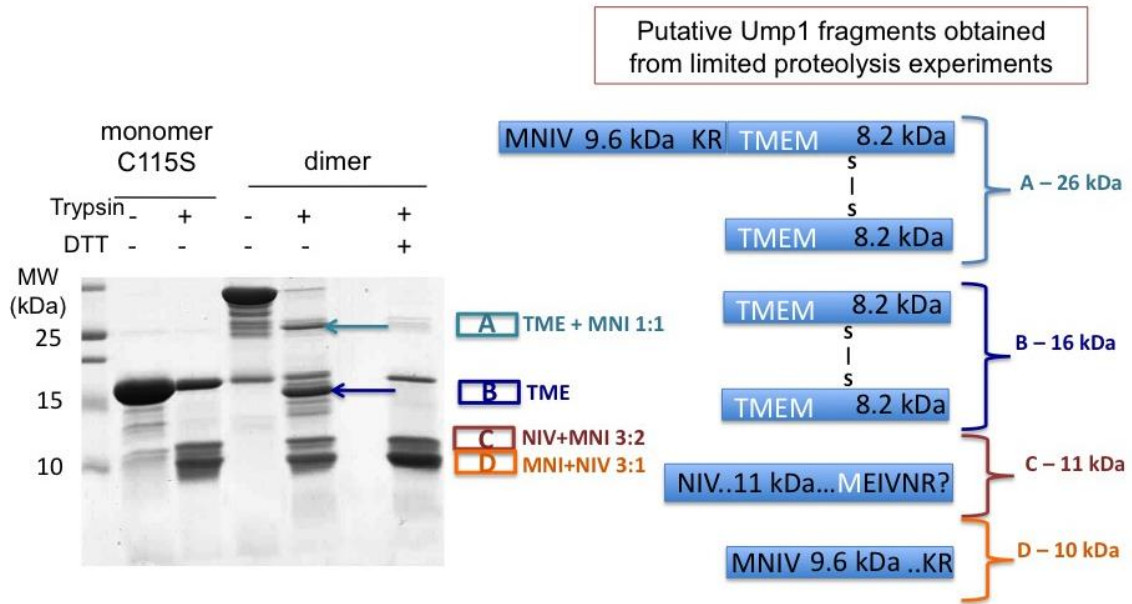

**Figure S1** – Limited proteolysis of recombinant yeast Ump1. Ump1-C115S monomer and wild-type dimer were incubated with trypsin (w/w 1000:1) at 37 °C for 30 minutes and the proteolysis fragments were separated by SDS-PAGE. The selected fragments (A, B, C and D) were analyzed by N-terminal sequencing and the results are displayed on the right side of the SDS-PAGE image. The main cleavage site identified is Arg84, which originates a 9.6 kDa N-terminal fragment and a 8.2 kDa C-terminal peptide. The C-terminal fragment, starting with the TMEM sequence can only be identified in dimeric Ump1 before disruption of the disulfide bridge with DTT. This might indicate that this peptide alone displays anomalous migration or it could not be efficiently transferred onto the PVDF membrane before N-terminal sequencing. Based on the analysis of the protein sequence and on the relative MW of the proteolysis fragments a possible interpretation of the results is presented on the right side of the image.

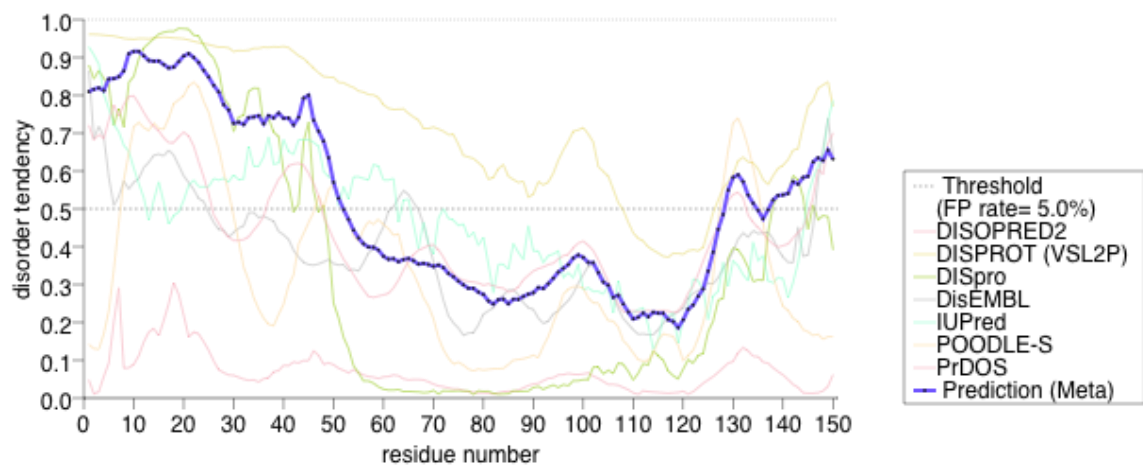

**Figure S2** - Disorder profile plot showing the combined disorder tendency for each residue in the yeast Ump1 amino acid sequence, obtained with the Meta Protein DisOrder prediction System [33].

**Table S1** – Similarity between the amino acid sequences of Ump1 orthologs selected for the alignment shown in Figure 2. The indicated values correspond to pairwise % of identity for the selected protein pairs.

| PONAB | HUMAN | BOVIN | MOUSE | DRMEG | SCHCE | SCHPO | DICDI |       |
|-------|-------|-------|-------|-------|-------|-------|-------|-------|
| 100   | 100   | 97    | 95    | 43    | 23    | 25    | 30    | PONAB |
|       | 100   | 97    | 95    | 43    | 23    | 25    | 30    | HUMAN |
|       |       | 100   | 96    | 43    | 25    | 25    | 30    | BOVIN |
|       |       |       | 100   | 42    | 24    | 26    | 31    | MOUSE |
|       |       |       |       | 100   | 27    | 23    | 20    | DRMEG |
|       |       |       |       |       | 100   | 34    | 18    | SCHCE |
|       |       |       |       |       |       | 100   | 20    | SCHPO |
|       |       |       |       |       |       |       | 100   | DICDI |
